# Supplementary material
Source: PubMed Central journal article supplement (PMC5916043)
Supplement: NIHMS950468-supplement-Acknowledgement_Permission_Form.pdf [file NIHMS950468-supplement-Acknowledgement_Permission_Form.pdf]

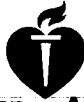

American Heart Association | American Stroke Association.

## Acknowledgment Permission Form

**Journal** Stroke

**Manuscript Number** 020356R1

**First Author** Wan Zhu

**Title of Work** Thalidomide Reduces Hemorrhage of Brain Arteriovenous Malformations in a Mouse Model

Authors must provide written permission/approval from all individuals mentioned by name in the Acknowledgments section of a submitted manuscript. By signing this form, any and all acknowledged persons therefore state that they have read and approved the mention of their names in the Acknowledgment section of the aforementioned paper.

|           |                   |           |                                                                                           |      |                |
|-----------|-------------------|-----------|-------------------------------------------------------------------------------------------|------|----------------|
| Name (1)  | <u>S. Paul Oh</u> | Signature | <u>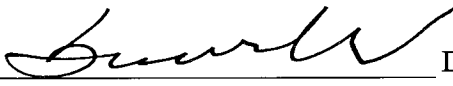</u> | Date | <u>2/15/18</u> |
| Name (2)  | _____             | Signature | _____                                                                                     | Date | _____          |
| Name (3)  | _____             | Signature | _____                                                                                     | Date | _____          |
| Name (4)  | _____             | Signature | _____                                                                                     | Date | _____          |
| Name (5)  | _____             | Signature | _____                                                                                     | Date | _____          |
| Name (6)  | _____             | Signature | _____                                                                                     | Date | _____          |
| Name (7)  | _____             | Signature | _____                                                                                     | Date | _____          |
| Name (8)  | _____             | Signature | _____                                                                                     | Date | _____          |
| Name (9)  | _____             | Signature | _____                                                                                     | Date | _____          |
| Name (10) | _____             | Signature | _____                                                                                     | Date | _____          |
| Name (11) | _____             | Signature | _____                                                                                     | Date | _____          |
| Name (12) | _____             | Signature | _____                                                                                     | Date | _____          |
| Name (13) | _____             | Signature | _____                                                                                     | Date | _____          |
| Name (14) | _____             | Signature | _____                                                                                     | Date | _____          |
| Name (15) | _____             | Signature | _____                                                                                     | Date | _____          |
| Name (16) | _____             | Signature | _____                                                                                     | Date | _____          |
| Name (17) | _____             | Signature | _____                                                                                     | Date | _____          |
| Name (18) | _____             | Signature | _____                                                                                     | Date | _____          |
| Name (19) | _____             | Signature | _____                                                                                     | Date | _____          |
| Name (20) | _____             | Signature | _____                                                                                     | Date | _____          |
