# Supplementary material
Source: PubMed Central journal article supplement (PMC5916043)
Supplement: NIHMS950468-supplement-Change_of_Authorship_Form.pdf [file NIHMS950468-supplement-Change_of_Authorship_Form.pdf]

## Change of Authorship Form

(Must be completed and signed by ALL authors)

Please check all that apply

\_\_\_\_ New author(s) have been added (in addition to this form, all new authors must complete the copyright transfer agreement and conflict of interest disclosure.

\_\_\_\_ Change in order of authorship.

\_\_\_\_ An author wishes to remove his/her name. An author's name may only be removed his/her own request and a letter signed by the author should accompany this form

Manuscript Number STROKE/2017/020356R1

Manuscript Title Thalidomide Reduces Hemorrhage of Brain Arteriovenous Malformations in a Mouse Model

### Former Authorship

Please list ALL AUTHORS in the same order as the original submission. For more than 12, use an extra sheet.

#### Print Name

Name (1) Wan Zhu  
Name (2) Wanqiu Chen  
Name (3) Dingquan Zou  
Name (4) Liang Wang  
Name (5) Chen Bao  
Name (6) Lei Zhan

#### Print Name

Name (7) Daniel Saw  
Name (8) Sen Wang  
Name (9) Ethan Winkler  
Name (10) Zhengxi Li  
Name (11) Meng Zhang  
Name (12) Fanxia Shen

### New Authorship

All authors must sign below agreeing to the changes in authorship. The authorship order must reflect the authorship order of the manuscript.

|                               |                                                                                                       |                     |
|-------------------------------|-------------------------------------------------------------------------------------------------------|---------------------|
| Name (1) <u>Wan Zhu</u>       | Signature <u></u> | Date <u>2/17/18</u> |
| Name (2) <u>Wanqin Chan</u>   | Signature <u></u> | Date <u>2/19/18</u> |
| Name (3) <u>Dingquan Zou</u>  | Signature _____                                                                                       | Date _____          |
| Name (4) <u>Liang wang</u>    | Signature _____                                                                                       | Date _____          |
| Name (5) <u>Chen Bao</u>      | Signature _____                                                                                       | Date _____          |
| Name (6) <u>Lei Zhan</u>      | Signature _____                                                                                       | Date _____          |
| Name (7) <u>Daniel Saw</u>    | Signature _____                                                                                       | Date _____          |
| Name (8) <u>San Wang</u>      | Signature _____                                                                                       | Date _____          |
| Name (9) <u>Ethan Winkler</u> | Signature _____                                                                                       | Date _____          |
| Name (10) <u>Zhengxi Li</u>   | Signature _____                                                                                       | Date _____          |
| Name (11) <u>Meng Zhang</u>   | Signature _____                                                                                       | Date _____          |
| Name (12) <u>Fanxia Shen</u>  | Signature <u></u> | Date <u>2/20/18</u> |

Please scan and email to [stroke@strokeahajournal.org](mailto:stroke@strokeahajournal.org).

## Change of Authorship Form

(Must be completed and signed by ALL authors)

Please check all that apply

New author(s) have been added (in addition to this form, all new authors must complete the copyright transfer agreement and conflict of interest disclosure.

Change in order of authorship.

An author wishes to remove his/her name. An author's name may only be removed his/her own request and a letter signed by the author should accompany this form

Manuscript Number STROKE/2017/020356R1

Manuscript Title Thalidomide Reduces Hemorrhage of Brain Arteriovenous Malformations in a Mouse Model

### Former Authorship

Please list ALL AUTHORS in the same order as the original submission. For more than 12, use an extra sheet.

#### Print Name

Name (1) Wan Zhu  
Name (2) Wanqiu Chen  
Name (3) Dingquan Zou  
Name (4) Liang Wang  
Name (5) Chen Bao  
Name (6) Lei Zhan

#### Print Name

Name (7) Daniel Saw  
Name (8) Sen Wang  
Name (9) Ethan Winkler  
Name (10) Zhengxi Li  
Name (11) Meng Zhang  
Name (12) Fanxia Shen

### New Authorship

All authors must sign below agreeing to the changes in authorship. The authorship order must reflect the authorship order of the manuscript.

|                               |                                                                                                       |                     |
|-------------------------------|-------------------------------------------------------------------------------------------------------|---------------------|
| Name (1) <u>Wan Zhu</u>       | Signature <u></u> | Date <u>2/17/18</u> |
| Name (2) <u>Wanqin Chan</u>   | Signature _____                                                                                       | Date _____          |
| Name (3) <u>Dingquan Zou</u>  | Signature <u>Dingquan Zou</u>                                                                         | Date <u>2/19/18</u> |
| Name (4) <u>Liang wang</u>    | Signature _____                                                                                       | Date _____          |
| Name (5) <u>Chen Bao</u>      | Signature _____                                                                                       | Date _____          |
| Name (6) <u>Lei Zhan</u>      | Signature _____                                                                                       | Date _____          |
| Name (7) <u>Daniel Saw</u>    | Signature _____                                                                                       | Date _____          |
| Name (8) <u>San Wang</u>      | Signature _____                                                                                       | Date _____          |
| Name (9) <u>Ethan Winkler</u> | Signature _____                                                                                       | Date _____          |
| Name (10) <u>Zhengxi Li</u>   | Signature _____                                                                                       | Date _____          |
| Name (11) <u>Meng Zhang</u>   | Signature _____                                                                                       | Date _____          |
| Name (12) <u>Fanxia Shen</u>  | Signature _____                                                                                       | Date _____          |

Please scan and email to [stroke@strokeahajournal.org](mailto:stroke@strokeahajournal.org).

## Change of Authorship Form

(Must be completed and signed by ALL authors)

Please check all that apply

\_\_\_\_ New author(s) have been added (in addition to this form, all new authors must complete the copyright transfer agreement and conflict of interest disclosure.

\_\_\_\_ Change in order of authorship.

\_\_\_\_ An author wishes to remove his/her name. An author's name may only be removed his/her own request and a letter signed by the author should accompany this form

Manuscript Number STROKE/2017/020356R1

Manuscript Title Thalidomide Reduces Hemorrhage of Brain Arteriovenous Malformations in a Mouse Model

### Former Authorship

Please list ALL AUTHORS in the same order as the original submission. For more than 12, use an extra sheet.

#### Print Name

Name (1) Wan Zhu  
Name (2) Wanqiu Chen  
Name (3) Dingquan Zou  
Name (4) Liang Wang  
Name (5) Chen Bao  
Name (6) Lei Zhan

#### Print Name

Name (7) Daniel Saw  
Name (8) Sen Wang  
Name (9) Ethan Winkler  
Name (10) Zhengxi Li  
Name (11) Meng Zhang  
Name (12) Fanxia Shen

### New Authorship

All authors must sign below agreeing to the changes in authorship. The authorship order must reflect the authorship order of the manuscript.

|                               |                             |                     |
|-------------------------------|-----------------------------|---------------------|
| Name (1) <u>Wan Zhu</u>       | Signature _____             | Date _____          |
| Name (2) <u>Wanqin Chan</u>   | Signature _____             | Date _____          |
| Name (3) <u>Dingquan Zou</u>  | Signature _____             | Date _____          |
| Name (4) <u>Liang wang</u>    | Signature <u>Liang Wang</u> | Date <u>2.20.20</u> |
| Name (5) <u>Chen Bao</u>      | Signature _____             | Date _____          |
| Name (6) <u>Lei Zhan</u>      | Signature _____             | Date _____          |
| Name (7) <u>Daniel Saw</u>    | Signature _____             | Date _____          |
| Name (8) <u>San Wang</u>      | Signature _____             | Date _____          |
| Name (9) <u>Ethan Winkler</u> | Signature _____             | Date _____          |
| Name (10) <u>Zhengxi Li</u>   | Signature _____             | Date _____          |
| Name (11) <u>Meng Zhang</u>   | Signature _____             | Date _____          |
| Name (12) <u>Fanxia Shen</u>  | Signature _____             | Date _____          |

Please scan and email to [stroke@strokeahajournal.org](mailto:stroke@strokeahajournal.org).

# Change of Authorship Form

(Must be completed and signed by ALL authors)

Please check all that apply

\_\_\_\_\_ New author(s) have been added (in addition to this form, all new authors must complete the copyright transfer agreement and conflict of interest disclosure.

\_\_\_\_\_ Change in order of authorship.

\_\_\_\_\_ An author wishes to remove his/her name. An author's name may only be removed his/her own request and a letter signed by the author should accompany this form

**Manuscript Number** STROKE/2017/020356R1

**Manuscript Title** Thalidomide Reduces Hemorrhage of Brain Arteriovenous Malformations in a Mouse Model

## Former Authorship

Please list ALL AUTHORS in the same order as the original submission. For more than 12, use an extra sheet.

### Print Name

Name (1) Wan Zhu  
Name (2) Wanqiu Chen  
Name (3) Dingquan Zou  
Name (4) Liang Wang  
Name (5) Chen Bao  
Name (6) Lei Zhan

### Print Name

Name (7) Daniel Saw  
Name (8) Sen Wang  
Name (9) Ethan Winkler  
Name (10) Zhengxi Li  
Name (11) Meng Zhang  
Name (12) Fanxia Shen

## New Authorship

All authors must sign below agreeing to the changes in authorship. The authorship order must reflect the authorship order of the manuscript.

|                               |                                                                                                |                        |
|-------------------------------|------------------------------------------------------------------------------------------------|------------------------|
| Name (1) <u>Wan Zhu</u>       | Signature _____                                                                                | Date _____             |
| Name (2) <u>Wanqin Chan</u>   | Signature _____                                                                                | Date _____             |
| Name (3) <u>Dingquan Zou</u>  | Signature _____                                                                                | Date _____             |
| Name (4) <u>Liang wang</u>    | Signature _____                                                                                | Date _____             |
| Name (5) <u>Chen Bao</u>      | Signature  | Date <u>02/19/2018</u> |
| Name (6) <u>Lei Zhan</u>      | Signature _____                                                                                | Date _____             |
| Name (7) <u>Daniel Saw</u>    | Signature _____                                                                                | Date _____             |
| Name (8) <u>San Wang</u>      | Signature _____                                                                                | Date _____             |
| Name (9) <u>Ethan Winkler</u> | Signature _____                                                                                | Date _____             |
| Name (10) <u>Zhengxi Li</u>   | Signature _____                                                                                | Date _____             |
| Name (11) <u>Meng Zhang</u>   | Signature _____                                                                                | Date _____             |
| Name (12) <u>Fanxia Shen</u>  | Signature _____                                                                                | Date _____             |

Please scan and email to [stroke@strokeahajournal.org](mailto:stroke@strokeahajournal.org).

# Change of Authorship Form

(Must be completed and signed by ALL authors)

Please check all that apply

New author(s) have been added (in addition to this form, all new authors must complete the copyright transfer agreement and conflict of interest disclosure.

Change in order of authorship.

An author wishes to remove his/her name. An author's name may only be removed his/her own request and a letter signed by the author should accompany this form

Manuscript Number STROKE/2017/020356R1

Manuscript Title Thalidomide Reduces Hemorrhage of Brain Arteriovenous Malformations in a Mouse Model

## Former Authorship

Please list ALL AUTHORS in the same order as the original submission. For more than 12, use an extra sheet.

### Print Name

Name (1) Wan Zhu  
Name (2) Wanqiu Chen  
Name (3) Dingquan Zou  
Name (4) Liang Wang  
Name (5) Chen Bao  
Name (6) Lei Zhan

### Print Name

Name (7) Daniel Saw  
Name (8) Sen Wang  
Name (9) Ethan Winkler  
Name (10) Zhengxi Li  
Name (11) Meng Zhang  
Name (12) Fanxia Shen

## New Authorship

All authors must sign below agreeing to the changes in authorship. The authorship order must reflect the authorship order of the manuscript.

|                               |                                                                                                |                     |
|-------------------------------|------------------------------------------------------------------------------------------------|---------------------|
| Name (1) <u>Wan Zhu</u>       | Signature _____                                                                                | Date _____          |
| Name (2) <u>Wanqin Chan</u>   | Signature _____                                                                                | Date _____          |
| Name (3) <u>Dingquan Zou</u>  | Signature _____                                                                                | Date _____          |
| Name (4) <u>Liang wang</u>    | Signature _____                                                                                | Date _____          |
| Name (5) <u>Chen Bao</u>      | Signature _____                                                                                | Date _____          |
| Name (6) <u>Lei Zhan</u>      | Signature 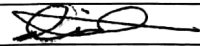 | Date <u>2/19/18</u> |
| Name (7) <u>Daniel Saw</u>    | Signature _____                                                                                | Date _____          |
| Name (8) <u>San Wang</u>      | Signature _____                                                                                | Date _____          |
| Name (9) <u>Ethan Winkler</u> | Signature _____                                                                                | Date _____          |
| Name (10) <u>Zhengxi Li</u>   | Signature _____                                                                                | Date _____          |
| Name (11) <u>Meng Zhang</u>   | Signature _____                                                                                | Date _____          |
| Name (12) <u>Fanxia Shen</u>  | Signature _____                                                                                | Date _____          |

Please scan and email to [stroke@strokeahajournal.org](mailto:stroke@strokeahajournal.org).

## Change of Authorship Form

(Must be completed and signed by ALL authors)

Please check all that apply

New author(s) have been added (in addition to this form, all new authors must complete the copyright transfer agreement and conflict of interest disclosure.

Change in order of authorship.

An author wishes to remove his/her name. An author's name may only be removed his/her own request and a letter signed by the author should accompany this form

Manuscript Number STROKE/2017/020356R1

Manuscript Title Thalidomide Reduces Hemorrhage of Brain Arteriovenous Malformations in a Mouse Model

### Former Authorship

Please list ALL AUTHORS in the same order as the original submission. For more than 12, use an extra sheet.

#### Print Name

Name (1) Wan Zhu  
Name (2) Wanqiu Chen  
Name (3) Dingquan Zou  
Name (4) Liang Wang  
Name (5) Chen Bao  
Name (6) Lei Zhan

#### Print Name

Name (7) Daniel Saw  
Name (8) Sen Wang  
Name (9) Ethan Winkler  
Name (10) Zhengxi Li  
Name (11) Meng Zhang  
Name (12) Fanxia Shen

### New Authorship

All authors must sign below agreeing to the changes in authorship. The authorship order must reflect the authorship order of the manuscript.

|                               |                             |                     |
|-------------------------------|-----------------------------|---------------------|
| Name (1) <u>Wan Zhu</u>       | Signature _____             | Date _____          |
| Name (2) <u>Wanqin Chan</u>   | Signature _____             | Date _____          |
| Name (3) <u>Dingquan Zou</u>  | Signature _____             | Date _____          |
| Name (4) <u>Liang wang</u>    | Signature _____             | Date _____          |
| Name (5) <u>Chen Bao</u>      | Signature _____             | Date _____          |
| Name (6) <u>Lei Zhan</u>      | Signature _____             | Date _____          |
| Name (7) <u>Daniel Saw</u>    | Signature <u>Daniel Saw</u> | Date <u>2-19-18</u> |
| Name (8) <u>San Wang</u>      | Signature _____             | Date _____          |
| Name (9) <u>Ethan Winkler</u> | Signature _____             | Date _____          |
| Name (10) <u>Zhengxi Li</u>   | Signature _____             | Date _____          |
| Name (11) <u>Meng Zhang</u>   | Signature _____             | Date _____          |
| Name (12) <u>Fanxia Shen</u>  | Signature _____             | Date _____          |

Please scan and email to [stroke@strokeahajournal.org](mailto:stroke@strokeahajournal.org).

## Change of Authorship Form

(Must be completed and signed by ALL authors)

Please check all that apply

\_\_\_\_ New author(s) have been added (in addition to this form, all new authors must complete the copyright transfer agreement and conflict of interest disclosure.

\_\_\_\_ Change in order of authorship.

\_\_\_\_ An author wishes to remove his/her name. An author's name may only be removed his/her own request and a letter signed by the author should accompany this form

Manuscript Number STROKE/2017/020356R1 \_\_\_\_\_

Manuscript Title Thalidomide Reduces Hemorrhage of Brain Arteriovenous Malformations in a Mouse Model

### Former Authorship

Please list ALL AUTHORS in the same order as the original submission. For more than 12, use an extra sheet.

#### Print Name

Name (1) Wan Zhu  
Name (2) Wanqiu Chen  
Name (3) Dingquan Zou  
Name (4) Liang Wang  
Name (5) Chen Bao  
Name (6) Lei Zhan

#### Print Name

Name (7) Daniel Saw  
Name (8) Sen Wang  
Name (9) Ethan Winkler  
Name (10) Zhengxi Li  
Name (11) Meng Zhang  
Name (12) Fanxia Shen

### New Authorship

All authors must sign below agreeing to the changes in authorship. The authorship order must reflect the authorship order of the manuscript.

|                               |                           |                     |
|-------------------------------|---------------------------|---------------------|
| Name (1) <u>Wan Zhu</u>       | Signature _____           | Date _____          |
| Name (2) <u>Wanqiu Chan</u>   | Signature _____           | Date _____          |
| Name (3) <u>Dingquan Zou</u>  | Signature _____           | Date _____          |
| Name (4) <u>Liang wang</u>    | Signature _____           | Date _____          |
| Name (5) <u>Chen Bao</u>      | Signature _____           | Date _____          |
| Name (6) <u>Lei Zhan</u>      | Signature _____           | Date _____          |
| Name (7) <u>Daniel Saw</u>    | Signature _____           | Date _____          |
| Name (8) <u>San Wang</u>      | Signature <u>San Wang</u> | Date <u>7/18/18</u> |
| Name (9) <u>Ethan Winkler</u> | Signature _____           | Date _____          |
| Name (10) <u>Zhengxi Li</u>   | Signature _____           | Date _____          |
| Name (11) <u>Meng Zhang</u>   | Signature _____           | Date _____          |
| Name (12) <u>Fanxia Shen</u>  | Signature _____           | Date _____          |

Please scan and email to [stroke@strokeahajournal.org](mailto:stroke@strokeahajournal.org).

# Change of Authorship Form

(Must be completed and signed by ALL authors)

Please check all that apply

New author(s) have been added (in addition to this form, all new authors must complete the copyright transfer agreement and conflict of interest disclosure.

Change in order of authorship.

An author wishes to remove his/her name. An author's name may only be removed his/her own request and a letter signed by the author should accompany this form

Manuscript Number STROKE/2017/020356R1

Manuscript Title Thalidomide Reduces Hemorrhage of Brain Arteriovenous Malformations in a Mouse Model

## Former Authorship

Please list ALL AUTHORS in the same order as the original submission. For more than 12, use an extra sheet.

### Print Name

Name (1) Wan Zhu  
Name (2) Wanqiu Chen  
Name (3) Dingquan Zou  
Name (4) Liang Wang  
Name (5) Chen Bao  
Name (6) Lei Zhan

### Print Name

Name (7) Daniel Saw  
Name (8) Sen Wang  
Name (9) Ethan Winkler  
Name (10) Zhengxi Li  
Name (11) Meng Zhang  
Name (12) Fanxia Shen

## New Authorship

All authors must sign below agreeing to the changes in authorship. The authorship order must reflect the authorship order of the manuscript.

|                               |                                                                                                |                     |
|-------------------------------|------------------------------------------------------------------------------------------------|---------------------|
| Name (1) _____                | Signature _____                                                                                | Date _____          |
| Name (2) _____                | Signature _____                                                                                | Date _____          |
| Name (3) _____                | Signature _____                                                                                | Date _____          |
| Name (4) _____                | Signature _____                                                                                | Date _____          |
| Name (5) _____                | Signature _____                                                                                | Date _____          |
| Name (6) _____                | Signature _____                                                                                | Date _____          |
| Name (7) _____                | Signature _____                                                                                | Date _____          |
| Name (8) _____                | Signature _____                                                                                | Date _____          |
| Name (9) <u>Ethan Winkler</u> | Signature  | Date <u>2/19/18</u> |
| Name (10) _____               | Signature _____                                                                                | Date _____          |
| Name (11) _____               | Signature _____                                                                                | Date _____          |
| Name (12) _____               | Signature _____                                                                                | Date _____          |

Please scan and email to [stroke@strokeahajournal.org](mailto:stroke@strokeahajournal.org).



# Change of Authorship Form

---

**(Must be completed and signed by ALL authors)**

Please check all that apply

\_\_\_\_ New author(s) have been added (in addition to this form, all new authors must complete the copyright transfer agreement and conflict of interest disclosure.

\_\_\_\_ Change in order of authorship.

\_\_\_\_ An author wishes to remove his/her name. An author's name may only be removed his/her own request and a letter signed by the author should accompany this form

**Manuscript Number** \_\_\_\_\_

**Manuscript Title** \_\_\_\_\_

## Former Authorship

Please list ALL AUTHORS in the same order as the original submission. For more than 12, use an extra sheet.

### Print Name

Name (1) \_\_\_\_\_  
Name (2) \_\_\_\_\_  
Name (3) \_\_\_\_\_  
Name (4) \_\_\_\_\_  
Name (5) \_\_\_\_\_  
Name (6) \_\_\_\_\_

### Print Name

Name (7) \_\_\_\_\_  
Name (8) \_\_\_\_\_  
Name (9) \_\_\_\_\_  
Name (10) \_\_\_\_\_  
Name (11) \_\_\_\_\_  
Name (12) \_\_\_\_\_

## New Authorship

All authors must sign below agreeing to the changes in authorship. The authorship order must reflect the authorship order of the manuscript.

|                 |                                                                                                |                |
|-----------------|------------------------------------------------------------------------------------------------|----------------|
| Name (1) _____  | Signature _____                                                                                | Date _____     |
| Name (2) _____  | Signature _____                                                                                | Date _____     |
| Name (3) _____  | Signature _____                                                                                | Date _____     |
| Name (4) _____  | Signature _____                                                                                | Date _____     |
| Name (5) _____  | Signature _____                                                                                | Date _____     |
| Name (6) _____  | Signature _____                                                                                | Date _____     |
| Name (7) _____  | Signature _____                                                                                | Date _____     |
| Name (8) _____  | Signature _____                                                                                | Date _____     |
| Name (9) _____  | Signature _____                                                                                | Date _____     |
| Name (10) _____ | Signature 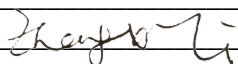 | Date 2/20/2018 |
| Name (11) _____ | Signature _____                                                                                | Date _____     |
| Name (12) _____ | Signature _____                                                                                | Date _____     |

**Please scan and email to [stroke@strokeahajournal.org](mailto:stroke@strokeahajournal.org).**

# Change of Authorship Form

**(Must be completed and signed by ALL authors)**

Please check all that apply

New author(s) have been added (in addition to this form, all new authors must complete the copyright transfer agreement and conflict of interest disclosure.

Change in order of authorship.

An author wishes to remove his/her name. An author's name may only be removed his/her own request and a letter signed by the author should accompany this form

**Manuscript Number** STROKE/2017/020356R1

**Manuscript Title** Thalidomide Reduces Hemorrhage of Brain Arteriovenous Malformations in a Mouse Model

## **Former Authorship**

Please list ALL AUTHORS in the same order as the original submission. For more than 12, use an extra sheet.

### **Print Name**

Name (1) Wan Zhu  
Name (2) Wanqiu Chen  
Name (3) Dingquan Zou  
Name (4) Liang Wang  
Name (5) Chen Bao  
Name (6) Lei Zhan

### **Print Name**

Name (7) Daniel Saw  
Name (8) Sen Wang  
Name (9) Ethan Winkler  
Name (10) Zhengxi Li  
Name (11) Meng Zhang  
Name (12) Fanxia Shen

## **New Authorship**

All authors must sign below agreeing to the changes in authorship. The authorship order must reflect the authorship order of the manuscript.

|                               |                             |                     |
|-------------------------------|-----------------------------|---------------------|
| Name (1) <u>Wan Zhu</u>       | Signature _____             | Date _____          |
| Name (2) <u>Wanqin Chan</u>   | Signature _____             | Date _____          |
| Name (3) <u>Dingquan Zou</u>  | Signature _____             | Date _____          |
| Name (4) <u>Liang wang</u>    | Signature _____             | Date _____          |
| Name (5) <u>Chen Bao</u>      | Signature _____             | Date _____          |
| Name (6) <u>Lei Zhan</u>      | Signature _____             | Date _____          |
| Name (7) <u>Daniel Saw</u>    | Signature _____             | Date _____          |
| Name (8) <u>San Wang</u>      | Signature _____             | Date _____          |
| Name (9) <u>Ethan Winkler</u> | Signature _____             | Date _____          |
| Name (10) <u>Zhengxi Li</u>   | Signature _____             | Date _____          |
| Name (11) <u>Meng Zhang</u>   | Signature <u>Meng Zhang</u> | Date <u>2/20/18</u> |
| Name (12) <u>Fanxia Shen</u>  | Signature _____             | Date _____          |

**Please scan and email to [stroke@strokeahajournal.org](mailto:stroke@strokeahajournal.org).**

## Change of Authorship Form

(Must be completed and signed by ALL authors)

Please check all that apply

\_\_\_\_ New author(s) have been added (in addition to this form, all new authors must complete the copyright transfer agreement and conflict of interest disclosure.

\_\_\_\_ Change in order of authorship.

\_\_\_\_ An author wishes to remove his/her name. An author's name may only be removed his/her own request and a letter signed by the author should accompany this form

Manuscript Number STROKE/2017/020356

Manuscript Title Thalidomide Reduces Hemorrhage of Brain Arteriovenous Malformations in a Mouse Model

### Former Authorship

Please list ALL AUTHORS in the same order as the original submission. For more than 12, use an extra sheet.

#### Print Name

Name (1) Michael Lawton  
Name (2) Hua Su (Corresponding author)  
Name (3) \_\_\_\_\_  
Name (4) \_\_\_\_\_  
Name (5) \_\_\_\_\_  
Name (6) \_\_\_\_\_

#### Print Name

Name (7) \_\_\_\_\_  
Name (8) \_\_\_\_\_  
Name (9) \_\_\_\_\_  
Name (10) \_\_\_\_\_  
Name (11) \_\_\_\_\_  
Name (12) \_\_\_\_\_

### New Authorship

All authors must sign below agreeing to the changes in authorship. The authorship order must reflect the authorship order of the manuscript.

|                                               |                                                                                                |                      |
|-----------------------------------------------|------------------------------------------------------------------------------------------------|----------------------|
| Name (1) <u>Sonali Shaligram</u>              | Signature  | Date <u>02/20/18</u> |
| Name (2) <u>Michael Lawton</u>                | Signature  | Date <u>2/19/18</u>  |
| Name (3) <u>Hua Su (Corresponding Author)</u> | Signature <u>Hua Su</u>                                                                        | Date <u>2/20/18</u>  |
| Name (4) _____                                | Signature _____                                                                                | Date _____           |
| Name (5) _____                                | Signature _____                                                                                | Date _____           |
| Name (6) _____                                | Signature _____                                                                                | Date _____           |
| Name (7) _____                                | Signature _____                                                                                | Date _____           |
| Name (8) _____                                | Signature _____                                                                                | Date _____           |
| Name (9) _____                                | Signature _____                                                                                | Date _____           |
| Name (10) _____                               | Signature _____                                                                                | Date _____           |
| Name (11) _____                               | Signature _____                                                                                | Date _____           |
| Name (12) _____                               | Signature _____                                                                                | Date _____           |

Please scan and email to [stroke@strokeahjournal.org](mailto:stroke@strokeahjournal.org).
